# Supplementary material
Source: HighWire-hosted journal article supplement (https://www.cmajopen.ca/content/suppl/2020/11/20/8.4.E788)
Supplement: 2020-0159-original-submission.pdf [file 2020-0159-original-submission.pdf]

1  
2  
3  
4 Outcomes and evolving clinical practice in COVID-19 patients admitted to ICU in Montreal, Quebec, Canada – A  
5 retrospective cohort study  
6  
7

8 Stephen Su Yang\*, Jed Lipes\*, Sandra Dial, Blair Schwartz, Denny Laporta, Evan Wong, Craig Baldry, Paul  
9 Warshawsky, Patricia McMillan, David Hornstein, Michel de Marchie, Dev Jayaraman  
10

11 \*co-first authors.  
12

13 Stephen Su Yang MD,  
14 Department of Anesthesia, Division of Critical Care  
15 Jewish General Hospital, McGill University  
16 3755 ch. de la Côte-Sainte-Catherine Rd, Suite H-364.1  
17 Montréal, QC H3T 1E2  
18

19 **Corresponding author:**

20  
21 Jed Lipes MD,  
22 Department of Medicine, Division of Critical Care  
23 Jewish General Hospital, McGill University  
24 3755 ch. de la Côte-Sainte-Catherine Rd, Suite H-364.1  
25 Montréal, QC H3T 1E2  
26 514-340-7500  
27 Jed.lipes@mcgill.ca  
28

29 Sandra Dial MD,  
30 Department of Medicine, Division of Critical Care  
31 Jewish General Hospital, McGill University  
32 3755 ch. de la Côte-Sainte-Catherine Rd, Suite H-364.1  
33 Montréal, QC H3T 1E2  
34

35 Blair Schwartz MD,  
36 Department of Medicine, Division of Critical Care  
37 Jewish General Hospital, McGill University  
38 3755 ch. de la Côte-Sainte-Catherine Rd, Suite H-364.1  
39 Montréal, QC H3T 1E2  
40

41 Denny Laporta MD,  
42 Department of Medicine, Division of Critical Care  
43 Jewish General Hospital, McGill University  
44 3755 ch. de la Côte-Sainte-Catherine Rd, Suite H-364.1  
45 Montréal, QC H3T 1E2  
46

47 Evan Wong MD  
48 Department of Surgery, Division of Critical Care  
49 Jewish General Hospital, McGill University  
50 3755 ch. de la Côte-Sainte-Catherine Rd, Suite H-364.1  
51 Montréal, QC H3T 1E2  
52

53 Craig Baldry MD,  
54 Department of Anesthesia, Division of Critical Care,  
55 Jewish General Hospital, McGill University  
56 3755 ch. de la Côte-Sainte-Catherine Rd, Suite H-364.1  
57 Montréal, QC H3T 1E2  
58  
59  
60

1  
2  
3 Paul Warshawsky MD  
4 Department of Medicine, Division of Critical Care  
5 Jewish General Hospital, McGill University  
6 3755 ch. de la Côte-Sainte-Catherine Rd, Suite H-364.1  
7 Montréal, QC H3T 1E2

8  
9 Patricia McMillan MD  
10 Department of Anesthesia, Division of Critical Care,  
11 Jewish General Hospital, McGill University  
12 3755 ch. de la Côte-Sainte-Catherine Rd, Suite H-364.1  
13 Montréal, QC H3T 1E2

14  
15 David Hornstein MD  
16 Department of Medicine, Division of Critical Care  
17 Jewish General Hospital, McGill University  
18 3755 ch. de la Côte-Sainte-Catherine Rd, Suite H-364.1  
19 Montréal, QC H3T 1E2

20  
21 Michel de Marchie MD  
22 Department of Medicine, Division of Critical Care  
23 Jewish General Hospital, McGill University  
24 3755 ch. de la Côte-Sainte-Catherine Rd, Suite H-364.1  
25 Montréal, QC H3T 1E2

26  
27 Dev Jayaraman MD  
28 Department of Medicine, Division of Critical Care  
29 Jewish General Hospital, McGill University  
30 3755 ch. de la Côte-Sainte-Catherine Rd, Suite H-364.1  
31 Montréal, QC H3T 1E2

32  
33  
34 **Funding:** No source of funding to declare.

35  
36 **Competing interests :** None declared

37  
38 **Author contribution:**

39 Conception, design, data analysis and drafting the manuscript: SY, JL, SD, BS and DJ  
40 Manuscript revisions and providing insight into the interpretation of results: DL, EW, CB, PW, PM, MDM.  
41 All authors approve and take responsibility for the data presented in this research.  
42  
43

44 **Running title:** Outcomes of critically ill COVID-19 in Montreal

45  
46 Word and Element counts: Abstract – 238 words, Main Text – 2424 words, 4 Figures, 4 Tables  
47  
48  
49  
50  
51  
52  
53  
54  
55  
56  
57  
58  
59  
60

1  
2  
3  
4  
5 Abstract

6  
7 Background: The COVID-19 pandemic is responsible for millions of infections worldwide and a significant  
8 proportion of these patients will be admitted to the intensive care unit. Limited data is available to describe this  
9 critically ill population. We describe the characteristics, outcomes and the evolution in management of critically ill  
10 Canadian patients with COVID-19 at a single designated pandemic centre in Montreal, Canada.  
11  
12  
13  
14  
15

16  
17 Methods: A retrospective cohort study was performed on all consecutive critically ill COVID-19 patients admitted  
18 between March 5<sup>th</sup> and May 21<sup>st</sup>, 2020. We also analyzed how clinical practice and outcomes evolved over time.  
19  
20  
21

22  
23 Results: A total of 106 patients were included in this study. The ICU mortality was 16.0% with 75.5% of patients  
24 discharged from the ICU. Mortality in patients requiring mechanical ventilation was 16.9%. Prone positioning was  
25 used in 27.4% of patients and no patient was placed on ECMO. Acute kidney injury was the most common  
26 complication, seen in 18.9% of patients, and 11.3% of patients required renal replacement therapy. 50.0% of patients  
27 received corticosteroids. As our practice evolved, there was a significant decrease in incidence of intubation (83.3%  
28 vs 50.0%,  $p<0.01$ ), and the use of high-flow nasal cannula increased (4.2% vs 44.0%,  $p<0.01$ ) with a trend towards  
29 improved mortality.  
30  
31  
32  
33  
34  
35  
36  
37

38 Interpretation: Our cohort of critically ill COVID-19 patients has a lower mortality than previously described in  
39 other jurisdictions. Access to critical beds and liberal use of corticosteroids may have contributed to our low  
40 observed mortality.  
41  
42  
43  
44  
45  
46  
47  
48  
49  
50  
51  
52  
53  
54  
55  
56  
57  
58  
59  
60

## Introduction

Coronavirus disease 19 (COVID-19) caused by severe acute respiratory syndrome coronavirus-2 (SARS-CoV-2) emerged in December 2019, and has caused millions of infections and claimed over 350,000 lives with an overall mortality rate of approximately 3% and a mortality of up to 60% in the critically ill.<sup>1-5</sup> Limited information is available to describe the outcomes of patients admitted to Intensive Care Units (ICU) in Canada. The Jewish General Hospital was the first designated pandemic centre for adults in Montreal, the epicentre of COVID-19 in Canada. As of May 27<sup>th</sup>, 2020, it had admitted 17% of all COVID-19 ICU patients in the city.<sup>6</sup> We describe the outcomes and patient management of critically ill Canadian patients with COVID-19 at our institution.

## Methods

### *Context*

This study was conducted at the Jewish General Hospital (JGH) in Montreal, Quebec, Canada, a 637 bed university-affiliated tertiary-care adult hospital which was designated by the provincial government as the initial receiving centre for all adult COVID-19 patients in Montreal during the first wave of pandemic admissions. The JGH ICU is a mixed medical/surgical unit with a maximum baseline capacity of 26 patients. To respond to the pandemic, a plan to gradually increase the number of available ICU beds to 50 was implemented. The first positive case of SARS-CoV-2 in the province of Quebec was diagnosed on February 27<sup>th</sup>, 2020. The JGH admitted Quebec's first COVID-19 patient to the ICU on March 5<sup>th</sup>.

1  
2  
3 During the following three months, many changes occurred in our institution and in the  
4 province. All elective surgeries were cancelled at our hospital on March 16<sup>th</sup>, and by the second  
5 week of March, the Quebec government declared a province-wide state of emergency. Quarantine  
6 and social distancing measures were initiated, generalized closures were implemented, and by the  
7 third week of March, only essential services were kept open. Due to the surge of patients in our  
8 ICU, on March 21<sup>st</sup>, the province expanded the list of designated hospitals in the Montreal region  
9 that could admit patients with COVID-19.  
10  
11  
12  
13  
14  
15  
16  
17  
18  
19  
20  
21

22 Staffing in the JGH ICU consisted of critical care trained attending physicians, critical care  
23 residents, as well as other trainees. As the ICU census expanded, as of March 28<sup>th</sup> critical care and  
24 anesthesia attendings provided in-house coverage 24 hours/day. Resident physician, ICU nursing  
25 and respiratory therapy capacity was increased by redeployment from other areas of the hospital,  
26 which allowed nursing to patient ratios to be maintained at a maximum of 1:1.2. All patients were  
27 cared for in single rooms and all health care workers in the unit had access to personal protective  
28 equipment (PPE).  
29  
30  
31  
32  
33  
34  
35  
36  
37  
38  
39  
40

41 As per our initial COVID-19 institutional protocol, between March 5<sup>th</sup> and April 24<sup>th</sup>, all patients  
42 were prescribed azithromycin 500mg daily for 5 days and hydroxychloroquine 200mg PO TID for  
43 10 days. All ICU patients were treated with standard weight based thromboprophylaxis with low  
44 molecular weight heparin, or unfractionated heparin, if contraindicated. However, intermediate  
45 dosing was permitted at the discretion of the treating physician.  
46  
47  
48  
49  
50  
51  
52  
53  
54  
55  
56  
57  
58  
59  
60

1  
2  
3 Management of mechanical ventilation was at the discretion of the treating physician. In our ICU,  
4 pressure regulated volume control was the default mode used for most patients with acute  
5 respiratory distress syndrome (ARDS), with a ventilation goal of 6 ml/kg predicted body weight  
6 (PBW). Fraction of inspired oxygen (FiO<sub>2</sub>) titration for intubated patients was supported using  
7 either the ALVEOLI low or high PEEP table, depending on the patient's oxygen needs and  
8 response to initial PEEP titration.<sup>7</sup> Prone positioning was often initiated when the FiO<sub>2</sub> was  
9 sustained above levels that are generally considered to be safe. Prone positioning was also utilized  
10 in non-intubated patients on high-flow nasal cannula (HFNC). Neuromuscular blockade was used  
11 when required to maintain patient ventilator synchrony and plateau pressures less than 30 cm H<sub>2</sub>O,  
12 after maximizing sedation and opioids. The use of non-invasive mask ventilation was not approved  
13 for use in patients with COVID-19 during the study period and our institution does not provide  
14 HFNC outside of the ICU.  
15  
16  
17  
18  
19  
20  
21  
22  
23  
24  
25  
26  
27  
28  
29  
30  
31  
32

### 33 *Analysis*

34  
35 A retrospective chart review was performed on all consecutive patients with polymerase chain  
36 reaction (PCR) positive SARS-CoV-2, admitted to the ICU with COVID-19, between March 5<sup>th</sup>  
37 and May 21<sup>st</sup>, with follow up data available until June 5<sup>th</sup>, 2020.  
38  
39  
40  
41  
42  
43  
44

45 Data was collected by authors SD, SY, and JL and abstracted from chart review and laboratory  
46 and pharmacology electronic medical records. Collected variables included demographic  
47 information, comorbidities, initial vital signs, laboratory results and COVID-19 specific symptoms  
48 and epidemiology. Interventions, including medical therapies, oxygenation methods and  
49  
50  
51  
52  
53  
54  
55  
56  
57  
58  
59  
60

1  
2  
3 ventilation strategies, were collected for all patients. Clinical outcomes, including length of stay,  
4 morbidity and mortality, were also analyzed.  
5  
6  
7  
8  
9

10 Baseline characteristics were described using descriptive statistics. Continuous variables were  
11 reported using median and interquartile range (IQR). Assuming a nonparametric distribution,  
12 Mann-Whitney U test was used to analyze differences for continuous variables and  $\chi^2$  test was used  
13 to describe categorical variables, as appropriate. As international data emerged on COVID-19 and  
14 we gained local experience as a high-volume pandemic centre, our clinical practice evolved. To  
15 evaluate this change over time, we compared, a priori, outcomes of patients admitted in the early  
16 phase of the pandemic (March 6<sup>th</sup> to April 5<sup>th</sup>) with those admitted later (April 6<sup>th</sup> to May 21<sup>st</sup>). For  
17 the purposes of this analysis, we elected to exclude the patients who had a no intubation advance  
18 directive. A Kaplan-Meier curve analysis was performed to examine the difference between the  
19 early versus late groups, with respect to the number of patients discharged alive from ICU over  
20 time. A logrank test was used to analyze differences between these two time periods. All tests were  
21 two-sided with a significance defined as  $p < 0.05$ . All analyses were performed using SAS version  
22 9.4 and STATA version 15.  
23  
24  
25  
26  
27  
28  
29  
30  
31  
32  
33  
34  
35  
36  
37  
38  
39  
40  
41  
42

43 This study was approved by the local Research Ethics Board of *Centre Intégré Universitaire en*  
44 *Santé et Services Sociaux* (CIUSSS) West-Central Montreal, Jewish General Hospital.  
45  
46  
47  
48  
49

## 50 Results

51  
52 During the study period, we admitted a total of 106 patients to the ICU with COVID-  
53 19 pneumonia, representing 23% of all COVID-19 hospitalizations in our institution. 76 (71.7%)  
54  
55  
56  
57  
58  
59  
60

1  
2  
3 were directly admitted from the emergency department. Four SARS-CoV-2 positive patients  
4 admitted for other medical/surgical reasons were excluded from our analysis. Table 1 presents the  
5 patient demographics and baseline clinical and laboratory characteristics of the patients. Median  
6 age was 66 years (IQR 54-74) with 64 male patients (60.4%). Eight patients (7.6%) were not  
7 candidates for intubation based on advanced directives. The median Charlson comorbidity index  
8 was 3 (IQR 1-4) and the median sequential organ failure assessment (SOFA) score on admission  
9 was 5 (IQR 3-8).

10  
11  
12  
13  
14  
15  
16  
17  
18  
19  
20  
21 Sixty-five patients (61.3%) required endotracheal intubation, with 29 patients (27.4%) undergoing  
22 prone positioning and 24 patients (22.6%) requiring neuromuscular blockade. HFNC was used for  
23 48 patients (45.3%). No patients required extracorporeal membrane oxygenation (ECMO). The  
24 most frequently prescribed medical therapies were azithromycin (88.7%), hydroxychloroquine  
25 (70.8%), broad-spectrum antibiotics (67.0%), and corticosteroids (50.0%). The most common  
26 corticosteroid used was dexamethasone (61.3%) (Table 2).

27  
28  
29  
30  
31  
32  
33  
34  
35  
36  
37 Our ICU mortality was 16.0% and hospital mortality was 17.9%, with 75.5% and 64.2% of the  
38 cohort discharged from ICU and hospital, respectively. Hospital mortality fell to 12.2% when  
39 excluding patients who refused intubation. No patients below the age of 50 died and only two of  
40 80 patients who were discharged alive from ICU died on the medical ward (Figure 1).

41  
42  
43  
44  
45  
46  
47  
48  
49 ICU mortality in patients requiring mechanical ventilation was 16.9%, with the majority of  
50 ventilated patients being older than 60 years old (Figure 2). Median duration of ventilation was 11  
51 days (IQR 8-16), with 38.5% of patients requiring mechanical ventilation for more than 14 days.



1  
2  
3 Median ICU and hospital length of stay were 9 (IQR 3-16) and 16 (IQR 8-23) days, respectively.  
4  
5 The most common complication was acute kidney injury (18.9%) while thromboembolic events  
6  
7 occurred in 14.2% of patients (Table 3).  
8  
9

10  
11  
12 We compared patient management and outcomes between our early and late time periods. Baseline  
13  
14 patient characteristics were similar except for age, with the second time period having slightly  
15  
16 younger patients than the first (67 vs 62 years,  $p<0.01$ ) (Table 4). There was  
17  
18 a significant decrease in the number of patients intubated (83.3% vs 50.0%,  $p<0.01$ ) and there was  
19  
20 a trend towards using lower PEEP (incidence of high PEEP use: 40.0% vs 24.0%,  $p=0.19$ ). Later  
21  
22 patients were also significantly more likely to be supported by HFNC (excluding use post-  
23  
24 extubation) (4.2% vs 44.0%,  $p<0.01$ ). Of the patients on HFNC, 42.7% never required intubation.  
25  
26 The proportion of patients discharged alive from ICU was similar in both groups despite later  
27  
28 patients having a shorter study period (Figure 3). Overall, there was a non-significant decrease in  
29  
30 hospital mortality (16.7% vs 8.0%,  $p=0.19$ ).  
31  
32  
33  
34  
35  
36  
37

38 Significantly more corticosteroids were used in the later group (39.6% vs 62.0%,  $p=0.03$ ), while  
39  
40 ICU acquired infections significantly decreased (35.4% vs 10.0%,  $p<0.01$ ). There was also a trend  
41  
42 towards a shorter stay in ICU (12 vs 7 days,  $p=0.14$ ).  
43  
44  
45  
46

#### 47 Interpretation

48  
49 In our retrospective cohort study of critically ill COVID-19 patients, we described an ICU  
50  
51 mortality of 16.0%. Despite comparable baseline characteristics, our cohort has a significantly  
52  
53 lower mortality rate compared to China, Europe and the United States.<sup>2,3,8,9</sup>  
54  
55  
56  
57  
58  
59  
60

1  
2  
3  
4  
5  
6 Our management practices evolved as we gained clinical experience and new data emerged. We  
7  
8 avoided the use of HFNC on COVID-19 patients in the early period because of the theoretical risk  
9  
10 of increased aerosolization and initial paucity of data on how SARS-CoV-2 is  
11  
12 transmitted.<sup>10,11</sup> However, as literature emerged showing minimal associated risk to health care  
13  
14 workers, we began treating patients with HFNC.<sup>12</sup> All patients on HFNC were treated in negative  
15  
16 pressure rooms with standard PPE and KN95 masks. Importantly, only three health care workers  
17  
18 in the ICU tested positive for SARS-CoV-2 during the study period, all of whom had an alternative  
19  
20 higher risk exposure outside of the ICU.  
21  
22  
23  
24  
25  
26

27 Although we did not demonstrate a significant mortality difference between our two time periods,  
28  
29 overall intubations were reduced, with a significant proportion of the patients on HFNC never  
30  
31 requiring intubation, which is consistent with literature in respiratory failure in patients without  
32  
33 COVID-19.<sup>13</sup> We were also able to extubate earlier and transition to HFNC rather than prolong  
34  
35 the duration of invasive mechanical ventilation, which may have contributed to the significantly  
36  
37 shorter ICU length of stay found in the later time period.  
38  
39  
40  
41  
42

43 With the recognition of COVID-19 specific clinical phenotypes, we used less PEEP and  
44  
45 neuromuscular blockade over time, and we also noted a decreased incidence of acute kidney injury  
46  
47 and need for renal replacement therapy.<sup>14</sup> High incidences of renal failure requiring dialysis have  
48  
49 been reported in other cohorts, with some centres preparing for use of acute continuous ambulatory  
50  
51 peritoneal dialysis as traditional modes of renal replacement became overwhelmed.<sup>15</sup> While this  
52  
53 may reflect a direct effect from the virus itself, it is possible that avoiding the known adverse  
54  
55  
56  
57  
58  
59  
60

1  
2  
3 hemodynamic effects of positive pressure ventilation and high PEEP, and blunting the  
4 inflammatory cascade with corticosteroids could account for the lower incidence seen in  
5 the later phase of our cohort.<sup>16-18</sup> Further research accounting for other confounding variables  
6 would be required to explore this hypothesis.  
7  
8  
9  
10

11  
12  
13  
14  
15 A large proportion of our patients received corticosteroids in the context of cytokine release  
16 syndrome (CRS) or severe ARDS. Corticosteroids were given late (median 13 days) after the start  
17 of symptoms, and the majority of patients were prescribed a regimen of dexamethasone as  
18 described by Villar *et al.*<sup>19</sup> In addition, 10.4% of patients were treated with Tocilizumab for CRS.  
19  
20  
21  
22  
23  
24 Corticosteroid use for coronavirus associated respiratory failure and CRS remains controversial,  
25 however a short course of corticosteroids given after the peak of viral shedding may be warranted,  
26 as the risk of worsening infection and outcome appears low.<sup>20-25</sup> Although the overall mortality  
27 rate is similar to the results from another Canadian study,<sup>26</sup> it is possible that treatment with  
28 corticosteroids and/or Tocilizumab was responsible for the shorter duration of mechanical  
29 ventilation that we observed. We look forward to the results of the recently completed Recovery  
30 trial from the United Kingdom, with early results showing low dose dexamethasone improves  
31 mortality in severe COVID-19.  
32  
33  
34  
35  
36  
37  
38  
39  
40  
41  
42  
43  
44

45 At the outset, we administered hydroxychloroquine to all patients based on preliminary reports of  
46 efficacy,<sup>27</sup> however this was subsequently discontinued on April 24<sup>th</sup> following emergence of data  
47 showing lack of benefit and ongoing questions of safety.<sup>28,29</sup> Although no patient died from a  
48 malignant arrhythmia, it remains possible patients may have experienced other drug side effects,  
49 including delirium or drug-drug interactions.  
50  
51  
52  
53  
54  
55  
56  
57  
58  
59  
60

1  
2  
3  
4  
5  
6 Using HFNC, standard lung protective ventilation, frequent use of prone positioning and  
7  
8 corticosteroids, there were no patients who met local criteria for ECMO. Although it remains  
9  
10 possible that some patients could have benefited from early ECMO use, current reports suggest a  
11  
12 very high mortality associated with the use of ECMO in COVID-19. Moreover, rational use  
13  
14 of such a resource intensive therapy is critical in the context of a pandemic.<sup>30-32</sup>  
15  
16  
17  
18  
19

20 During the study period, although local capacity was at times under stress, ICU resources were  
21  
22 never completely overwhelmed, which may have contributed to our relatively low ICU mortality.  
23  
24 Redeployment of nursing and respiratory therapists from other areas of the hospital to increase  
25  
26 ICU capacity was critical as the JGH ICU admitted the majority of critically ill COVID-19 patients  
27  
28 in the first few weeks of the Quebec pandemic. This proportion decreased to eventually stabilize  
29  
30 at 10% of all provincial COVID-19 ICU admissions as other ICUs in Montreal were activated by  
31  
32 the provincial pandemic protocol (Figure 4).  
33  
34  
35  
36  
37  
38

39 Another possible contributor to the lower mortality observed in both our study and that of Mitra et  
40  
41 al. is the free universal health care system in Canada which minimizes socio-economic barriers to  
42  
43 access care.<sup>26</sup> Reports from the USA show high rates of death in marginalized populations and in  
44  
45 particular, African Americans.<sup>33,34</sup> In contrast, we found no mortality association with race, with  
46  
47 only one death out of 16 Black Canadian patients.  
48  
49  
50  
51  
52

53 This study has several important limitations. Given the retrospective nature of our study, any link  
54  
55 between our interventions and the observed outcomes is speculative. The duration of follow-up is  
56  
57  
58  
59  
60

1  
2  
3 limited, although only a small proportion of patients remain in the ICU at the time of censoring. It  
4  
5 is also a single centre study in Canada which may not be applicable to other jurisdictions, however,  
6  
7 this remains the largest case series of critically ill patients in the epicentre of the Canadian COVID-  
8  
9 19 pandemic.  
10

## 11 12 13 14 15 Conclusion

16  
17 The mortality of critically ill patients with COVID-19 in the Canadian context is significant,  
18  
19 however appears to be less than previously described in other countries. Provincial and  
20  
21 institutional pandemic preparedness and the ability to quickly increase human resources may be in  
22  
23 part responsible for the lower observed mortality. High quality studies are urgently needed to help  
24  
25 guide the appropriate use of mechanical ventilation strategies, including the role of HFNC and  
26  
27 prone positioning, as well as antiviral, corticosteroids and/or antithrombotic therapy in COVID-  
28  
29 19.  
30  
31  
32  
33  
34  
35  
36  
37  
38  
39  
40  
41  
42  
43  
44  
45  
46  
47  
48  
49  
50  
51  
52  
53  
54  
55  
56  
57  
58  
59  
60

1  
2  
3  
4  
5  
6  
7  
8  
9  
10  
11 Acknowledgement

12  
13 The authors would like to acknowledge the dedicated work of the entire ICU team including  
14 nursing, respiratory therapy, medical residents, orderlies, pharmacy, housekeeping and clerical  
15 staff for their tireless and devoted work during this unprecedented medical event. We would also  
16 like to acknowledge the assistance from the Department of Anesthesia, the Division of Infectious  
17 Disease as well as the hospital and provincial healthcare leadership.  
18  
19  
20  
21  
22  
23  
24  
25  
26  
27  
28  
29  
30  
31  
32  
33  
34  
35  
36  
37  
38  
39  
40  
41  
42  
43  
44  
45  
46  
47  
48  
49  
50  
51  
52  
53  
54  
55  
56  
57  
58  
59  
60

## References

1. Baud D, Qi X, Nielsen-Saines K, Musso D, Pomar L, Favre G. Real estimates of mortality following COVID-19 infection. *Lancet Infect Dis* 2020.
2. Grasselli G, Zangrillo A, Zanella A, et al. Baseline Characteristics and Outcomes of 1591 Patients Infected With SARS-CoV-2 Admitted to ICUs of the Lombardy Region, Italy. *Jama* 2020; **323**(16): 1574-81.
3. Yang X, Yu Y, Xu J, et al. Clinical course and outcomes of critically ill patients with SARS-CoV-2 pneumonia in Wuhan, China: a single-centered, retrospective, observational study. *Lancet Respir Med* 2020; **8**(5): 475-81.
4. Cummings MJ, Baldwin MR, Abrams D, et al. Epidemiology, clinical course, and outcomes of critically ill adults with COVID-19 in New York City: a prospective cohort study. *Lancet* 2020.
5. Murthy S, Gomersall CD, Fowler RA. Care for Critically Ill Patients With COVID-19. *Jama* 2020.
6. Santé et Services sociaux Québec. [msss.gouv.qc.ca/professionnels/maladies-infectieuses/coronavirus-2019-ncov/](https://msss.gouv.qc.ca/professionnels/maladies-infectieuses/coronavirus-2019-ncov/).
7. Brower RG, Lanken PN, MacIntyre N, et al. Higher versus lower positive end-expiratory pressures in patients with the acute respiratory distress syndrome. *N Engl J Med* 2004; **351**(4): 327-36.
8. Arentz M, Yim E, Klaff L, et al. Characteristics and Outcomes of 21 Critically Ill Patients With COVID-19 in Washington State. *Jama* 2020; **323**(16): 1612-4.
9. Auld SC, Caridi-Scheible M, Blum JM, et al. ICU and Ventilator Mortality Among Critically Ill Adults With Coronavirus Disease 2019. *Crit Care Med* 2020.
10. Loh NW, Tan Y, Taculod J, et al. The impact of high-flow nasal cannula (HFNC) on coughing distance: implications on its use during the novel coronavirus disease outbreak. *Can J Anaesth* 2020; **67**(7): 893-4.
11. Tran K, Cimon K, Severn M, Pessoa-Silva CL, Conly J. Aerosol generating procedures and risk of transmission of acute respiratory infections to healthcare workers: a systematic review. *PLoS One* 2012; **7**(4): e35797.
12. Li J, Fink JB, Ehrmann S. High-flow nasal cannula for COVID-19 patients: low risk of bio-aerosol dispersion. *Eur Respir J* 2020; **55**(5).
13. Rochweg B, Granton D, Wang DX, et al. High flow nasal cannula compared with conventional oxygen therapy for acute hypoxemic respiratory failure: a systematic review and meta-analysis. *Intensive Care Med* 2019; **45**(5): 563-72.
14. Marini JJ, Gattinoni L. Management of COVID-19 Respiratory Distress. *Jama* 2020.
15. El Shamy O, Sharma S, Winston J, Uribarri J. Peritoneal Dialysis During the Coronavirus 2019 (COVID-19) Pandemic: Acute Inpatient and Maintenance Outpatient Experiences. *Kidney Med* 2020.
16. Vieillard-Baron A, Matthay M, Teboul JL, et al. Experts' opinion on management of hemodynamics in ARDS patients: focus on the effects of mechanical ventilation. *Intensive Care Med* 2016; **42**(5): 739-49.
17. Leite TT, Gomes CAM, Valdivia JMC, Libório AB. Respiratory parameters and acute kidney injury in acute respiratory distress syndrome: a causal inference study. *Ann Transl Med* 2019; **7**(23): 742.

18. Shinozaki M, Muteki T, Kaku N, Tsuda H. Hemodynamic relationship between renal venous pressure and blood flow regulation during positive end-expiratory pressure. *Crit Care Med* 1988; **16**(2): 144-7.
19. Villar J, Ferrando C, Martínez D, et al. Dexamethasone treatment for the acute respiratory distress syndrome: a multicentre, randomised controlled trial. *Lancet Respir Med* 2020; **8**(3): 267-76.
20. Ye Z, Wang Y, Colunga-Lozano LE, et al. Efficacy and safety of corticosteroids in COVID-19 based on evidence for COVID-19, other coronavirus infections, influenza, community-acquired pneumonia and acute respiratory distress syndrome: a systematic review and meta-analysis. *Cmaj* 2020.
21. Gomersall CD. Pro/con clinical debate: steroids are a key component in the treatment of SARS. Pro: Yes, steroids are a key component of the treatment regimen for SARS. *Crit Care* 2004; **8**(2): 105-7.
22. Villar J, Confalonieri M, Pastores SM, Meduri GU. Rationale for Prolonged Corticosteroid Treatment in the Acute Respiratory Distress Syndrome Caused by Coronavirus Disease 2019. *Crit Care Explor* 2020; **2**(4): e0111.
23. Liu B, Li M, Zhou Z, Guan X, Xiang Y. Can we use interleukin-6 (IL-6) blockade for coronavirus disease 2019 (COVID-19)-induced cytokine release syndrome (CRS)? *J Autoimmun* 2020; **111**: 102452.
24. Lee N, Allen Chan KC, Hui DS, et al. Effects of early corticosteroid treatment on plasma SARS-associated Coronavirus RNA concentrations in adult patients. *J Clin Virol* 2004; **31**(4): 304-9.
25. Yang SS, Lipes J. Corticosteroids for critically ill COVID-19 patients with cytokine release syndrome: a limited case series. *Can J Anaesth* 2020: 1-3.
26. Mitra AR, Fergusson NA, Lloyd-Smith E, et al. Baseline characteristics and outcomes of patients with COVID-19 admitted to intensive care units in Vancouver, Canada: a case series. *Cmaj* 2020.
27. Gautret P, Lagier JC, Parola P, et al. Hydroxychloroquine and azithromycin as a treatment of COVID-19: results of an open-label non-randomized clinical trial. *Int J Antimicrob Agents* 2020: 105949.
28. Juurlink DN. Safety considerations with chloroquine, hydroxychloroquine and azithromycin in the management of SARS-CoV-2 infection. *Cmaj* 2020; **192**(17): E450-e3.
29. Mahévas M, Tran VT, Roumier M, et al. Clinical efficacy of hydroxychloroquine in patients with covid-19 pneumonia who require oxygen: observational comparative study using routine care data. *Bmj* 2020; **369**: m1844.
30. Henry BM, Lippi G. Poor survival with extracorporeal membrane oxygenation in acute respiratory distress syndrome (ARDS) due to coronavirus disease 2019 (COVID-19): Pooled analysis of early reports. *J Crit Care* 2020; **58**: 27-8.
31. Yang X, Cai S, Luo Y, et al. Extracorporeal Membrane Oxygenation for Coronavirus Disease 2019-Induced Acute Respiratory Distress Syndrome: A Multicenter Descriptive Study. *Crit Care Med* 2020.
32. Parhar KKS, Lequier L, Blackwood J, Zuege DJ, Singh G. Optimizing provision of extracorporeal life support during the COVID-19 pandemic: practical considerations for Canadian jurisdictions. *Cmaj* 2020; **192**(14): E372-e4.



- 1
- 2
- 3
- 4 33. Ferdinand KC, Nasser SA. African-American COVID-19 Mortality: A Sentinel Event. *J Am Coll Cardiol* 2020; **75**(21): 2746-8.
- 5
- 6 34. Okonkwo NE, Aguwa UT, Jang M, et al. COVID-19 and the US response: accelerating health
- 7 inequities. *BMJ Evid Based Med* 2020.
- 8
- 9
- 10
- 11
- 12
- 13
- 14
- 15
- 16
- 17
- 18
- 19
- 20
- 21
- 22
- 23
- 24
- 25
- 26
- 27
- 28
- 29
- 30
- 31
- 32
- 33
- 34
- 35
- 36
- 37
- 38
- 39
- 40
- 41
- 42
- 43
- 44
- 45
- 46
- 47
- 48
- 49
- 50
- 51
- 52
- 53
- 54
- 55
- 56
- 57
- 58
- 59
- 60

Confidential

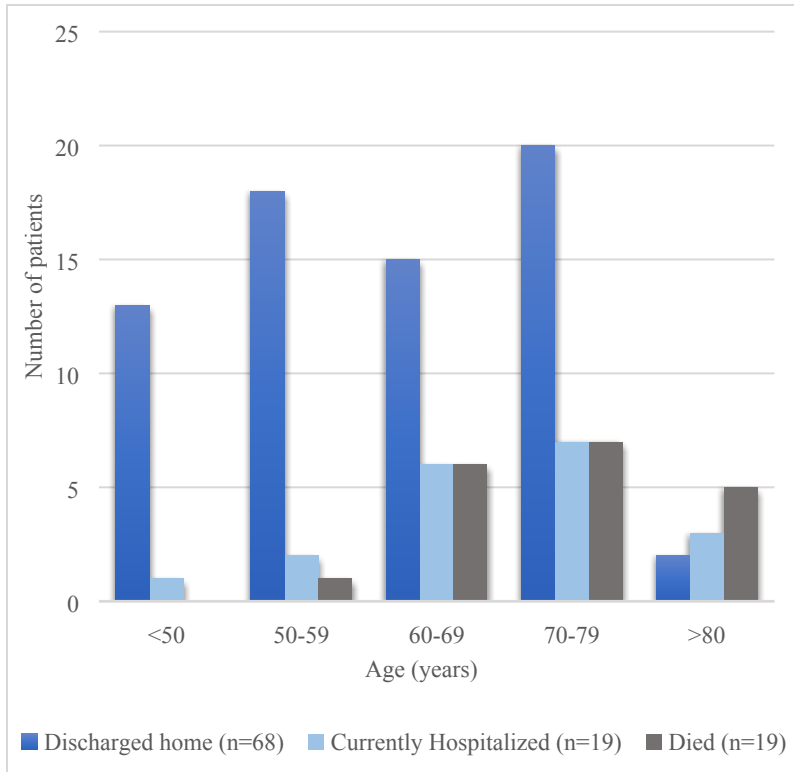

Figure 1. Disposition by age.

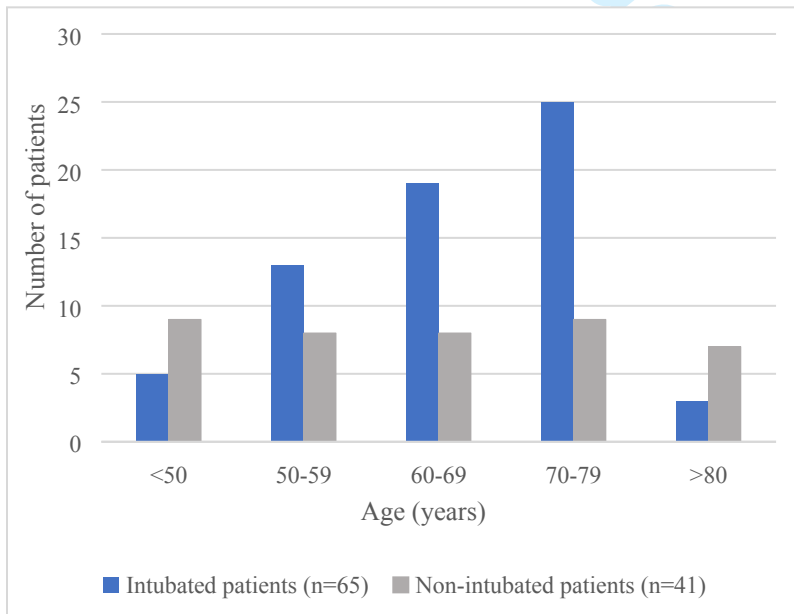

Figure 2. Intubation status by age

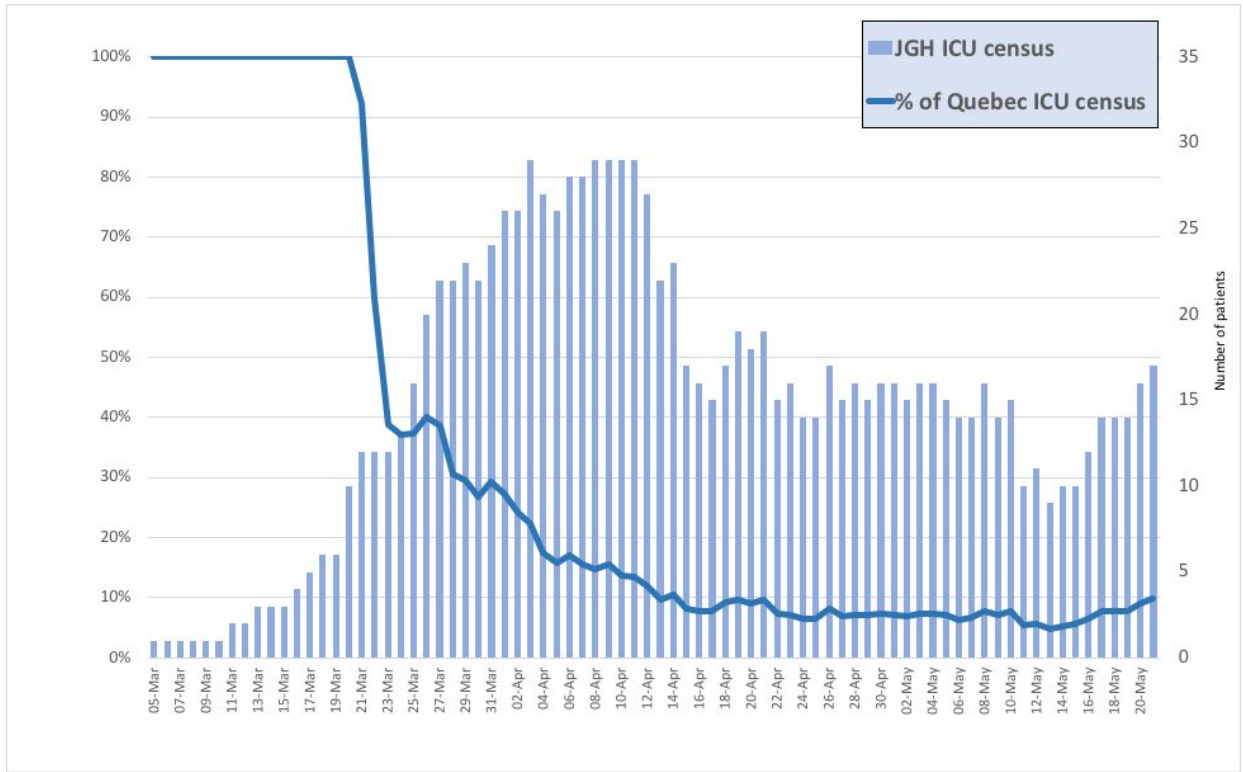

Figure 3. Daily COVID-19 census

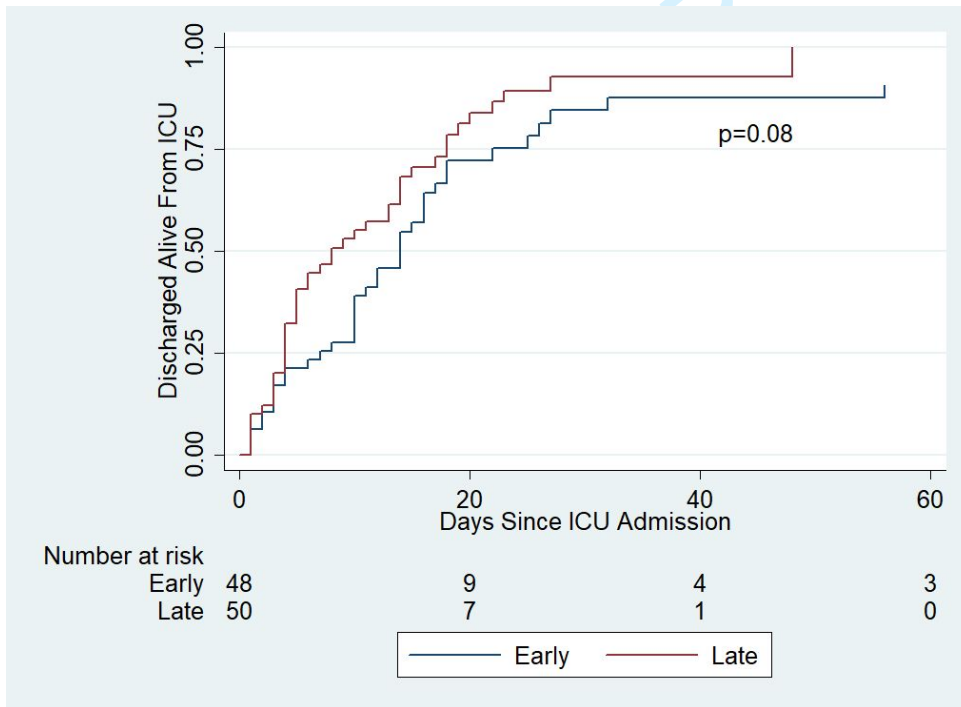

Figure 4: Kaplan-Meier survival to ICU discharge by time period

| Characteristics                                  | Total n=106      |
|--------------------------------------------------|------------------|
| Age, median (IQR)                                | 66 (54-74)       |
| Male                                             | 64 (60.4)        |
| Body mass index, median (IQR), n=76              | 29.4 (25.3-33.8) |
| Pregnant                                         | 3 (2.8)          |
| Black Canadian                                   | 16 (15.1)        |
| Symptomatic household contact                    | 34 (32.1)        |
| Patients with a no intubation advanced directive | 8 (7.6)          |
| Nursing home resident                            | 11 (10.4)        |
| Charlson comorbidity index, median (IQR)         | 3 (1-4)          |
| SOFA score*, median (IQR)                        | 5 (3-8)          |
| PaO <sub>2</sub> /FiO <sub>2</sub> †, n=63       | 133 (95-174)     |
| <b>Comorbidities</b>                             |                  |
| Hypertension                                     | 55 (51.9)        |
| Diabetes mellitus                                | 30 (28.3)        |
| Coronary artery disease                          | 15 (14.2)        |
| Obesity, n=89                                    | 41 (46.1)        |
| Chronic kidney disease                           | 10 (9.4)         |
| Chronic obstructive lung disease                 | 8 (7.6)          |
| Asthma                                           | 10 (9.4)         |
| Malignancy                                       | 10 (9.4)         |
| Immunocompromised‡                               | 12 (11.3)        |

**Table 1. Baseline demographics and clinical characteristics**

Results expressed as n (%) unless otherwise stated.

\*SOFA: Sequential organ assessment score excluding the neurologic component; Worst SOFA calculated after 24hrs of admission.

†Worst PaO<sub>2</sub>/FiO<sub>2</sub> calculated 24hrs post intubation.

‡HIV or patient treated with steroid, chemotherapy, or biologic medication.

| Intervention                                             | Total n=106 |
|----------------------------------------------------------|-------------|
| <b>Respiratory management</b>                            |             |
| Invasive mechanical ventilation                          | 65 (61.3)   |
| High PEEP <sup>†</sup>                                   | 22 (33.9)   |
| PEEP at 24 hours post intubation, median (IQR), n=63     | 10 (8-12)   |
| Prone positioning                                        | 29 (27.4)   |
| Intubated                                                | 19 (65.5)   |
| Not intubated                                            | 10 (34.5)   |
| High-flow nasal cannula                                  | 48 (45.3)   |
| Initial respiratory support <sup>‡</sup>                 | 29 (60.4)   |
| Post-extubation support                                  | 21 (43.8)   |
| <b>Medication</b>                                        |             |
| Neuromuscular blockade                                   | 24 (22.6)   |
| Corticosteroids                                          | 53 (50.0)   |
| Symptom onset to receipt of steroids, days, median (IQR) | 13 (10-17)  |
| Azithromycin                                             | 94 (88.7)   |
| Hydroxychloroquine                                       | 75 (70.8)   |
| Tocilizumab                                              | 11 (10.4)   |
| Oseltamivir                                              | 8 (7.6)     |
| Lopinavir/Ritonavir                                      | 6 (5.7)     |

**Table 2. Critical care management of ICU patients with COVID-19**

Results expressed as n (%) unless otherwise stated. PEEP: positive end-expiratory pressure

<sup>†</sup>High PEEP defined as PEEP > 15 cm H<sub>2</sub>O during mechanical ventilation

<sup>‡</sup> Two patients had high-flow nasal cannula for both indications

|                                                              | <b>Total n=106</b> |
|--------------------------------------------------------------|--------------------|
| <b>Outcomes</b>                                              |                    |
| Hospital mortality                                           | 19 (17.9)          |
| ICU mortality                                                | 17 (16.0)          |
| ICU mortality in mechanically ventilated patients, n=65      | 11 (16.9)          |
| Discharged from hospital                                     | 68 (64.2)          |
| Discharged alive from ICU                                    | 80 (75.5)          |
| Currently in ICU                                             | 7 (6.6)            |
| Currently on medical ward                                    | 12 (11.3)          |
| Duration of mechanical ventilation, days, median (IQR), n=57 | 11 (8-16)          |
| ICU length of stay, days, median (IQR), n=99                 | 9 (3-16)           |
| Hospital length of stay, days, median (IQR), n=87            | 16 (8-23)          |
| Tracheostomy                                                 | 6 (5.7)            |
| <b>Complications</b>                                         |                    |
| ICU acquired infection*                                      | 22 (20.8)          |
| Atrial fibrillation                                          | 24 (22.6)          |
| Acute kidney injury†                                         | 20 (18.9)          |
| Renal replacement therapy                                    | 12 (11.3)          |
| Thrombotic events‡                                           | 15 (14.2)          |
| Pulmonary embolism / Deep vein thrombosis                    | 11 (10.4)          |
| Ischemic stroke                                              | 6 (5.7)            |
| Peripheral arterial thrombosis                               | 1 (0.9)            |

**Table 3. Outcomes and complications in critically ill COVID-19 patients.**

Results expressed as n (%) unless otherwise stated.

\*Positive culture results with pathogenic organisms

†Greater than 2x baseline creatinine

‡thromboembolic event confirmed by imaging, two patients had > 1 thrombotic events.

Early †  
N=48

Late‡  
N=50

p-value

1  
2  
3  
4  
5  
6  
7  
8  
9  
10  
11  
12  
13  
14  
15  
16  
17  
18  
19  
20  
21  
22  
23  
24  
25  
26  
27  
28  
29  
30  
31  
32  
33  
34  
35  
36  
37  
38  
39  
40  
41  
42  
43  
44  
45  
46  
47  
48  
49  
50  
51  
52  
53  
54  
55  
56  
57  
58  
59  
60

Confidential

|                                                                |               |              |       |
|----------------------------------------------------------------|---------------|--------------|-------|
| Age, median (IQR)                                              | 67 (62-74)    | 62 (50-72)   | 0.01  |
| Male                                                           | 32 (66.7)     | 28 (56.0)    | 0.28  |
| Comorbidities*                                                 |               |              | 0.52  |
| 0                                                              | 15 (31.3)     | 21 (42.0)    |       |
| 1                                                              | 17 (35.4)     | 16 (32.0)    |       |
| ≥2                                                             | 16 (33.3)     | 13 (26.0)    |       |
| PaO <sub>2</sub> /FiO <sub>2</sub> ratio <sup>††</sup> , n=63  | 136 (112-177) | 114 (83-161) | 0.01  |
| <b>Management</b>                                              |               |              |       |
| High PEEP (>15 cm H <sub>2</sub> O), n (%)                     | 16 (40.0)     | 6 (24.0)     | 0.19  |
| Prone positioning, n (%)                                       | 12 (25.0)     | 16 (32.0)    | 0.44  |
| Not intubated                                                  | 1             | 8            | 0.28  |
| High-flow nasal cannula, n (%)                                 | 15 (31.3)     | 28 (56.0)    | 0.01  |
| Initial respiratory support                                    | 2 (4.2)       | 22 (44.0)    | <0.01 |
| Neuromuscular blockade, n (%)                                  | 16 (33.3)     | 8 (16.0)     | 0.05  |
| Hydroxychloroquine                                             | 48 (100.0)    | 25 (50.0)    | <0.01 |
| Corticosteroids, n (%)                                         | 19 (39.6)     | 31 (62.0)    | 0.03  |
| Symptom onset to receipt of steroids, days, median (IQR), n=50 | 17 (13-22)    | 12 (9-15)    | 0.02  |
| <b>Outcomes</b>                                                |               |              |       |
| Intubation, n (%)                                              | 40 (83.3)     | 25 (50.0)    | <0.01 |
| Hospital mortality, n (%)                                      | 8 (16.7)      | 4 (8.0)      | 0.19  |
| ICU mortality, n (%)                                           | 7 (14.6)      | 4 (8.0)      | 0.30  |
| Discharged from hospital, n (%)                                | 33 (68.8)     | 35 (70.0)    | 0.89  |
| Discharged alive from ICU                                      | 37 (77.1)     | 43 (86.0)    | 0.25  |
| Duration of mechanical ventilation, days, median (IQR), n=57   | 11 (8-17)     | 12 (6-14)    | 0.87  |
| ICU length of stay, days, median (IQR), n=92                   | 12 (6-17)     | 7 (4-14)     | 0.14  |
| Hospital length of stay, days, median (IQR), n=80              | 17 (11-24)    | 14 (8-23)    | 0.23  |
| <b>Complications</b>                                           |               |              |       |
| ICU acquired infection, n (%)                                  | 17 (35.4)     | 5 (10.0)     | <0.01 |
| Acute kidney injury, n (%)                                     | 12 (25.0)     | 8 (16.0)     | 0.27  |
| Renal replacement therapy, n (%)                               | 9 (18.8)      | 3 (6.0)      | 0.05  |

**Table 4. Patient characteristics, management and outcomes by time period.**

† Early: Patients admitted between March 5<sup>th</sup> and April 5<sup>th</sup>, 2020;

‡ Late: Patients admitted between April 6<sup>th</sup> and May 21<sup>st</sup>, 2020.

\*Comorbidities include: hypertension, diabetes mellitus, coronary artery disease, and chronic kidney disease.

††Worst PaO<sub>2</sub>/FiO<sub>2</sub> calculated 24hrs post intubation.
